# Supplementary material for: Snus in pregnancy and infant birth size: a mother–child birth cohort study
Source: PubMed Central journal article supplement — ERJ Open Res. 2019 Dec 2;5(4):00255-2019. doi: 10.1183/23120541.00255-2019 (PMC6885591; doi:10.1183/23120541.00255-2019), 2019-12-02

## **ONLINE SUPPLEMENTARY INFORMATION to Snus in pregnancy and infant birth size; a mother-child birth cohort study**

### **Methods**

Inclusion criteria were singleton and twin pregnancies at week 16-22 and sufficient Scandinavian language skills. Upon primary enrolment the women were informed about how to complete the 18- and 34-weeks electronic questionnaires.

Although we had available birth weight and tobacco exposure for the excluded infants born before gestational week 35, we chose not to include them because of potential bias such as severe disease.

Twin pregnancies were excluded mainly because their mean birth weight of 2682 grams was significantly different (p-value <0.000) from the singletons' mean weight of 3582 grams.

The Standard Operating Procedures for anthropometric measurements were based upon a pilot where different measuring methods were tested. We chose the procedures that were easiest to perform and had the highest inter-rater reliability.

### **Discussion**

In the entire cohort with available GA at birth (both included and non-included in this study), there was no significant difference between tobacco exposure groups when separated into preterm (GA <37 weeks) and term (GA ≥37 weeks) delivered babies (eTable S2). In addition, of the 10 excluded preterm infants born before gestational week 35, only one was exposed to snus during pregnancy, making the exposure in this group considered the same as for the rest of the cohort.

There are limitations related to the timing and method of the biometric measure used in the routine ultrasound scan conducted between weeks 16-22 as the basis for GA identification. Ultrasound measures in the first trimester are supposed to be more reliable at identifying gestational age due to lower biological variation in fetal size. Femur length was the standardized measure in all study sites and therefore used to estimate GA as the biometric measures of the fetal head circumference were assessed differently in Sweden and Norway.

**Table S1 Baseline characteristics of the study population**

|                                              |                              | PreventADALL cohort; twins excluded n=2688 |                     |         |
|----------------------------------------------|------------------------------|--------------------------------------------|---------------------|---------|
|                                              |                              | Completed 18 and/or 34 W Q n=2515          |                     |         |
|                                              |                              | Included                                   | Not included in the |         |
| Background characteristics                   | No.                          | N=2313                                     | mother-child cohort | P-value |
|                                              |                              |                                            | N=202               |         |
| <b>Fetal sex, male no. (%), no. (%)</b>      | 2313                         | 1216 (52.6)                                | -                   |         |
| <b>GA at birth, mean (no.)</b>               | 2347                         |                                            |                     |         |
|                                              | Weeks                        | 39.3 (1.7)                                 | 38.2 (2.3)          | <0.001  |
|                                              | Days                         | 274.8 (11.7)                               | 267.3 (16.0)        | <0.001  |
| <b>Maternal factors, mean (SD)</b>           |                              |                                            |                     |         |
|                                              | Age - years                  | 2515 32.4 (4.1)                            | 32.2 (4.5)          | 0.37    |
|                                              | Pre-pregnancy BMI            | 2450 23.1 (3.6)                            | 23.5 (4.2)          | 0.15    |
|                                              | Height - cm                  | 2480 168.0 (6.2)                           | 167.8 (6.4)         | 0.63    |
|                                              | Weight before pregnancy - kg | 2461 65.4 (11.2)                           | 66.2 (12.3)         | 0.33    |
|                                              | Weight at inclusion - kg     | 2488 70.1 (11.2)                           | 70.8 (12.4)         | 0.43    |
|                                              | 18w BMI                      | 2478 24.8 (3.7)                            | 25.2 (4.2)          | 0.23    |
| <b>Pregnancy history, no. (%)</b>            |                              |                                            |                     |         |
| Current in vitro fertilization               | 2501                         |                                            |                     | 0.91    |
|                                              | Yes                          | 177 (7.7)                                  | 15 (7.5)            |         |
| Previous miscarriage(s) <12w                 | 2501                         |                                            |                     |         |
|                                              | 0                            | 1737 (75.2)                                | 149 (74.1)          | 0.45    |
|                                              | 1                            | 408 (17.7)                                 | 41 (20.4)           |         |
|                                              | >1                           | 165 (7.1)                                  | 11 (5.5)            |         |
| Previous late miscarriage/stillbirths 12-23w | 2501                         |                                            |                     | 0.91    |
|                                              | 0                            | 2250 (97.8)                                | 197 (98.0)          |         |
|                                              | 1                            | 48 (2.1)                                   | 4 (2.0)             |         |
|                                              | >1                           | 2 (0.1)                                    | 0 (0.0)             |         |
| Parity                                       | 2337                         |                                            |                     |         |
|                                              | 0                            | 1290 (60.0)                                | 114 (61.0)          | 0.31    |
|                                              | 1                            | 677 (31.5)                                 | 63 (33.7)           |         |
|                                              | >1                           | 183 (8.5)                                  | 10 (5.3)            |         |
| <b>Sociodemographic factors, no. (%)</b>     |                              |                                            |                     |         |
| Education                                    | 2328                         |                                            |                     | 0.57    |
|                                              | Preliminary school only      | 16 (0.7)                                   | 2 (1.1)             |         |
|                                              | High school only             | 219 (10.2)                                 | 18 (9.6)            |         |
|                                              | Higher education <4 years    | 682 (31.9)                                 | 70 (37.4)           |         |
|                                              | Higher education ≥4 years    | 1222 (57.1)                                | 97 (51.9)           |         |
|                                              | Other                        | 2 (0.1)                                    | 0 (0.0)             |         |
| Country of origin                            | 2337                         |                                            |                     | 0.10    |
|                                              | Norway and Sweden            | 1914 (89.0)                                | 159 (85.0)          |         |
|                                              | Rest of the world            | 236 (11.0)                                 | 28 (15.0)           |         |
| Marital status                               | 2337                         |                                            |                     | 0.020   |
|                                              | Married                      | 885 (41.2)                                 | 77 (41.2)           |         |
|                                              | Cohabitants                  | 1210 (56.3)                                | 99 (52.9)           |         |
|                                              | Single                       | 37 (1.7)                                   | 5 (2.7)             |         |

|                                        |                              |             |            |           |
|----------------------------------------|------------------------------|-------------|------------|-----------|
|                                        | Divorced/separated           | 1 (0.0)     | 0 (0.0)    |           |
|                                        | Other                        | 17 (0.8)    | 7 (3.2)    |           |
| Living area                            |                              | 2337        |            | 0.17      |
|                                        | City, densely populated      | 834 (38.8)  | 76 (40.6)  |           |
|                                        | City, less densely populated | 817 (38.0)  | 60 (32.1)  |           |
|                                        | Suburb                       | 343 (16.0)  | 29 (15.5)  |           |
|                                        | Countryside, village         | 111 (5.1)   | 16 (8.6)   |           |
|                                        | Countryside, outside village | 46 (2.1)    | 6 (3.2)    |           |
| Household income                       |                              | 2337        |            | 0.15      |
|                                        | Low                          | 25 (1.2)    | 5 (2.7)    |           |
|                                        | Middle                       | 1150 (53.5) | 108 (57.8) |           |
|                                        | High                         | 938 (43.6)  | 70 (37.4)  |           |
|                                        | Not reported                 | 37 (1.7)    | 4 (2.1)    |           |
| <b>Smoking history, no. (%)</b>        |                              |             |            |           |
| Previous smoking                       |                              | 2337        | 475 (22.1) | 54 (28.9) |
| In utero exposure to cigarette smoking |                              | 2337        |            | 0.56      |
|                                        | No                           | 1623 (75.5) | 137 (73.3) |           |
|                                        | Yes                          | 306 (14.2)  | 32 (17.1)  |           |
|                                        | Do not know                  | 221 (9.5)   | 18 (9.6)   |           |

No.=number, SD=standard deviation, g=grams, BMI=body mass index, kg=kilogram, w=week, pop=populated

**Table S2: Tobacco exposure among term ( $\geq 37$  weeks) and preterm infants ( $< 37$  weeks)**

**All subjects in the PreventADALL cohort (except twins) included at 18W with available gestational age (GA) and questionnaire (n=2347)**

|                  | Total      | Never       | Tobacco exposure during pregnancy |            | P-value |
|------------------|------------|-------------|-----------------------------------|------------|---------|
|                  |            |             | Snus only                         | Smoke/dual |         |
| Preterm* no. (%) | 281 (100)  | 250 (89.0)  | 13 (4.6)                          | 18 (6.4)   | 0.103   |
| Term no. (%)     | 2066 (100) | 1834 (88.8) | 144 (7.0)                         | 88 (4.3)   |         |

\*Preterm: infants born  $< 37$  weeks.

**Table S3. Results on building the multivariable linear regression models to determine significant covariates for the final model of each outcome.** Significance level: 5 per cent.

| Outcomes                                       | Covariates                                                                                                                                                                  |                                                                         |
|------------------------------------------------|-----------------------------------------------------------------------------------------------------------------------------------------------------------------------------|-------------------------------------------------------------------------|
|                                                | Non-significant                                                                                                                                                             | Significant                                                             |
| Abdominal circumference/Head circumference     | Previous smoking history<br>Maternal education<br>In utero exposure to tobacco<br>Marital status<br>Living area<br>Pre-pregnancy BMI<br>GA at birth                         | Parity<br>Fetal sex<br>Maternal age                                     |
| Thoracic circumference/Abdominal circumference | Previous smoking history<br>Maternal education<br>In utero exposure to tobacco<br>Marital status<br>Living area<br>Pre-pregnancy BMI<br>Parity<br>Fetal sex<br>Maternal age | GA at birth                                                             |
| Thoracic circumference/Head circumference      | Previous smoking history<br>Maternal education<br>In utero exposure to tobacco<br>Marital status<br>Living area<br>Pre-pregnancy BMI                                        | GA at birth<br>Parity<br>Fetal sex<br>Maternal age                      |
| Birth weight/placenta weight                   | Previous smoking history<br>Maternal education<br>In utero exposure to tobacco<br>Marital status<br>Living area<br>Pre-pregnancy BMI                                        | GA at birth<br>Parity<br>Fetal sex<br>Maternal age                      |
| Upper left arm circumference                   | Previous smoking history<br>Maternal education<br>In utero exposure to tobacco<br>Marital status<br>Living area                                                             | GA at birth<br>Parity<br>Fetal sex<br>Maternal age<br>Pre-pregnancy BMI |
| Abdominal circumference                        | Previous smoking history<br>Maternal education<br>In utero exposure to tobacco<br>Marital status<br>Living area                                                             | GA at birth<br>Parity<br>Fetal sex<br>Maternal age<br>Pre-pregnancy BMI |
| Length                                         | Previous smoking history<br>Maternal education<br>In utero exposure to tobacco<br>Marital status<br>Maternal age                                                            | GA at birth<br>Parity<br>Fetal sex<br>Pre-pregnancy BMI<br>Living area  |
| Birth weight                                   | Previous smoking history<br>Maternal education<br>In utero exposure to tobacco<br>Marital status<br>Living area                                                             | GA at birth<br>Parity<br>Fetal sex<br>Maternal age<br>Pre-pregnancy BMI |
| Head circumference                             | Previous smoking history<br>Maternal education<br>In utero exposure to tobacco<br>Marital status<br>Living area<br>Maternal age                                             | GA at birth<br>Parity<br>Fetal sex<br>Pre-pregnancy BMI                 |
| Thoracic circumference                         | Previous smoking history                                                                                                                                                    | GA at birth                                                             |

Placenta weight

Maternal education  
In utero exposure to tobacco  
Marital status  
Living area  
Previous smoking history  
Maternal education  
In utero exposure to tobacco  
Marital status  
Maternal age

Parity  
Fetal sex  
Pre-pregnancy BMI  
Maternal age  
GA at birth  
Parity  
Fetal sex  
Pre-pregnancy BMI  
Living area

**Table S4. Linear regression analyses: Effect of tobacco exposure during pregnancy on anthropometric measures (cm).** The reference group ‘Never’ includes all women who did not report use of tobacco or nicotine during pregnancy. The ‘Smoke/dual’ group includes dual smokers and snus users during pregnancy of who most quit before 6 weeks of pregnancy.

| Tobacco exposure during pregnancy              | No.  | B                  | 95% CI        | P-value | No.                           | B     | 95% CI        | P-value |               |
|------------------------------------------------|------|--------------------|---------------|---------|-------------------------------|-------|---------------|---------|---------------|
|                                                |      |                    |               |         |                               |       |               |         | <b>Length</b> |
|                                                |      | <b>Univariable</b> |               |         | <b>Multivariable (1-4, 6)</b> |       |               |         |               |
|                                                |      |                    |               |         |                               |       |               | 0.27    | 0.37          |
| Never                                          | 1718 | Ref.               |               |         | 1718                          | Ref.  |               |         |               |
| Snus                                           | 137  | 0.28               | (-0.09, 0.64) |         | 137                           | 0.24  | (-0.10, 0.58) |         |               |
| Smoke/dual                                     | 93   | -0.13              | (-0.57, 0.31) |         | 93                            | 0.04  | (-0.37, 0.44) |         |               |
|                                                |      |                    |               |         |                               |       |               | 0.44    |               |
| Never                                          | 1718 | Ref.               |               |         | 1718                          | Ref.  |               | 0.49    |               |
| Snus only up to 18w                            | 128  | 0.26               | (-0.12, 0.64) |         | 128                           | 0.28  | (-0.07, 0.63) |         |               |
| Snus only up to 34w                            | 9    | 0.47               | (-0.91, 1.9)  |         | 9                             | -0.06 | (-1.3, 1.2)   |         |               |
| Smoke/dual                                     | 93   | -0.13              | (-0.57, 0.31) |         | 93                            | 0.04  | (-0.37, 0.44) |         |               |
| <b>Head circumference</b>                      |      |                    |               |         |                               |       |               |         |               |
|                                                |      | <b>Univariable</b> |               |         | <b>Multivariable* (1-4)</b>   |       |               |         |               |
|                                                |      |                    |               |         |                               |       |               | 0.023   | 0.023         |
| Never                                          | 1762 | Ref.               |               |         | 1762                          | Ref.  |               |         |               |
| Snus                                           | 143  | 0.34               | (0.10, 0.60)  |         | 143                           | 0.32  | (0.09, 0.55)  |         |               |
| Smoke/dual                                     | 95   | 0.017              | (-0.28, 0.32) |         | 95                            | 0.097 | (-0.18, 0.38) |         |               |
|                                                |      |                    |               |         |                               |       |               | 0.041   | <b>0.055</b>  |
| Never                                          | 1762 | Ref.               |               |         | 1762                          | Ref.  |               |         |               |
| Snus only up to 18w                            | 132  | 0.31               | (0.06, 0.57)  |         | 132                           | 0.31  | (0.07, 0.55)  |         |               |
| Snus only up to 34w                            | 11   | 0.71               | (-0.14, 1.57) |         | 11                            | 0.41  | (-0.39, 1.2)  |         |               |
| Smoke/dual                                     | 95   | 0.017              | (-0.28, 0.32) |         | 95                            | 0.10  | (-0.18, 0.38) |         |               |
| <b>Head circumference sensitivity analyses</b> |      |                    |               |         |                               |       |               |         |               |
|                                                |      | <b>Univariable</b> |               |         | <b>Multivariable (1-4, 7)</b> |       |               |         |               |
|                                                |      |                    |               |         |                               |       |               | 0.014   | 0.053         |
| Never                                          | 1684 | Ref.               |               |         | 1684                          | Ref.  |               |         |               |
| Snus                                           | 137  | 0.37               | (0.12, 0.62)  |         | 137                           | 0.29  | (0.06, 0.53)  |         |               |
| Smoke/dual                                     | 88   | 0.004              | (-0.31, 0.31) |         | 88                            | 0.03  | (-0.26, 0.32) |         |               |
|                                                |      |                    |               |         |                               |       |               | 0.024   | 0.108         |
| Never                                          | 1684 | Ref.               |               |         | 1684                          | Ref.  |               |         |               |
| Snus only up to 18w                            | 127  | 0.34               | (0.08, 0.60)  |         | 127                           | 0.28  | (0.03, 0.53)  |         |               |
| Snus only up to 34w                            | 10   | 0.81               | (-0.09, 1.7)  |         | 10                            | 0.47  | (-0.37, 1.3)  |         |               |
| Smoke/dual                                     | 88   | 0.004              | (-0.31, 0.31) |         | 88                            | 0.03  | (-0.26, 0.32) |         |               |
| <b>Thoracic circumference</b>                  |      |                    |               |         |                               |       |               |         |               |
|                                                |      | <b>Univariable</b> |               |         | <b>Multivariable (1-5)</b>    |       |               |         |               |



|                     |      |       |               |      |      |       |               |
|---------------------|------|-------|---------------|------|------|-------|---------------|
|                     |      |       |               | 0.28 |      |       | 0.27          |
| Never               | 1710 | Ref.  |               |      | 1710 | Ref.  |               |
| Snus                | 136  | 0.23  | (-0.10, 0.56) |      | 136  | 0.18  | (-0.13, 0.49) |
| Smoke/dual          | 89   | 0.19  | (-0.21, 0.60) |      | 89   | 0.23  | (-0.15, 0.61) |
|                     |      |       |               | 0.43 |      |       | 0.26          |
| Never               | 1710 | Ref.  |               |      | 1710 | Ref.  |               |
| Snus only up to 18w | 126  | 0.25  | (-0.09, 0.60) |      | 126  | 0.23  | (-0.09, 0.55) |
| Snus only up to 34w | 10   | -0.03 | (-1.21, 1.16) |      | 10   | -0.46 | (-1.56, 0.64) |
| Smoke/dual          | 89   | 0.19  | (-0.21, 0.60) |      | 89   | 0.23  | (-0.15, 0.61) |

#### Abdominal circumference

|                     | Univariable |       |               | Multivariable (1-5) |      |       |               |
|---------------------|-------------|-------|---------------|---------------------|------|-------|---------------|
|                     |             |       |               | 0.69                |      |       | 0.75          |
| Never               | 1709        | Ref.  |               |                     | 1709 | Ref.  |               |
| Snus                | 136         | 0.09  | (-0.29, 0.47) |                     | 136  | 0.07  | (-0.30, 0.43) |
| Smoke/dual          | 89          | -0.16 | (-0.63, 0.30) |                     | 89   | -0.15 | (-0.59, 0.30) |
|                     |             |       |               | 0.86                |      |       | 0.85          |
| Never               | 1709        | Ref.  |               |                     | 1709 | Ref.  |               |
| Snus only up to 18w | 126         | 0.08  | (-0.31, 0.48) |                     | 126  | 0.09  | (-0.29, 0.47) |
| Snus only up to 34w | 10          | 0.14  | (-1.20, 1.49) |                     | 10   | -0.23 | (-1.52, 1.05) |
| Smoke/dual          | 89          | -0.16 | (-0.63, 0.30) |                     | 89   | -0.15 | (-0.59, 0.30) |

#### Left upper arm circumference

|                     | Univariable |      |               | Multivariable (1-5) |      |       |               |
|---------------------|-------------|------|---------------|---------------------|------|-------|---------------|
|                     |             |      |               | 0.13                |      |       | 0.13          |
| Never               | 1718        | Ref. |               |                     | 1718 | Ref.  |               |
| Snus                | 136         | 0.19 | (0.01, 0.37)  |                     | 136  | 0.18  | (0.00, 0.35)  |
| Smoke/dual          | 88          | 0.04 | (-0.19, 0.26) |                     | 88   | 0.04  | (-0.17, 0.25) |
|                     |             |      |               | 0.25                |      |       | 0.22          |
| Never               | 1718        | Ref. |               |                     | 1718 | Ref.  |               |
| Snus only up to 18w | 126         | 0.19 | (-0.00, 0.37) |                     | 126  | 0.19  | (0.01, 0.40)  |
| Snus only up to 34w | 10          | 0.19 | (-0.45, 0.84) |                     | 10   | 0.002 | (-0.61, 0.61) |
| Smoke/dual          | 88          | 0.04 | (-0.19, 0.26) |                     | 88   | 0.04  | (-0.17, 0.25) |

\*The results of the multivariable analyses restricted by the same study population as in the sensitivity analyses without adjusting for gestational weight gain, were similar in both populations (data not shown). Covariates used in multivariable analyses: 1=Parity, 2=gestational age at birth, 3=fetal sex, 4=pre-pregnancy body mass index, 5=maternal age, 6=living area, 7=gestational weight gain up to 18 weeks of pregnancy.

No.=number, B=beta coefficient, CI=confidence interval, Ref.=reference value, w=week.

**Table S5. Linear regression analyses: Effect of tobacco exposure during pregnancy on proportional size measures (ratio).** The reference group ‘Never’ includes all women who did not report use of tobacco or nicotine during pregnancy. The ‘Smoke/dual’ group includes dual smokers and snus users during pregnancy of who most quit before 6 weeks of pregnancy.

| Tobacco exposure during pregnancy                     | No.                                               | B      | 95% CI        | P-value | No.                        | B      | 95% CI        | P-value |
|-------------------------------------------------------|---------------------------------------------------|--------|---------------|---------|----------------------------|--------|---------------|---------|
|                                                       | <b>Abdominal circumference/head circumference</b> |        |               |         |                            |        |               |         |
|                                                       | <b>Univariable</b>                                |        |               |         | <b>Multivariable (1-4)</b> |        |               |         |
|                                                       |                                                   |        |               | 0.46    |                            |        |               | 0.36    |
| Never                                                 | 1724                                              | Ref.   |               |         | 1724                       | Ref.   |               |         |
| Snus only                                             | 139                                               | -0.005 | (-0.02, 0.00) |         | 139                        | -0.005 | (-0.02, 0.01) |         |
| Smoke/dual                                            | 90                                                | -0.004 | (-0.02, 0.01) |         | 90                         | -0.007 | (-0.02, 0.01) |         |
|                                                       |                                                   |        |               | 0.60    |                            |        |               | 0.48    |
| Never                                                 | 1724                                              | Ref.   |               |         | 1661                       | Ref.   |               |         |
| Snus only up to 18w                                   | 129                                               | -0.005 | (-0.02, 0.01) |         | 126                        | -0.004 | (-0.01, 0.01) |         |
| Snus only up to 34w                                   | 10                                                | -0.014 | (-0.05, 0.02) |         | 10                         | -0.016 | (-0.05, 0.02) |         |
| Smoke/dual                                            | 90                                                | -0.004 | (-0.02, 0.01) |         | 87                         | -0.007 | (-0.02, 0.01) |         |
| <b>Thoracic circumference/Abdominal circumference</b> |                                                   |        |               |         |                            |        |               |         |
|                                                       | <b>Univariable</b>                                |        |               |         | <b>Multivariable (2)</b>   |        |               |         |
|                                                       |                                                   |        |               | 0.10    |                            |        |               | 0.09    |
| Never                                                 | 1889                                              | Ref.   |               |         | 1889                       | Ref.   |               |         |
| Snus                                                  | 140                                               | 0.003  | (-0.01, 0.01) |         | 140                        | 0.003  | (-0.01, 0.01) |         |
| Smoke/dual                                            | 90                                                | 0.01   | (0.00, 0.02)  |         | 90                         | 0.01   | (0.00, 0.02)  |         |
|                                                       |                                                   |        |               | 0.12    |                            |        |               | 0.10    |
| Never                                                 | 1889                                              | Ref.   |               |         | 1889                       | Ref.   |               |         |
| Snus only up to 18w                                   | 129                                               | 0.004  | (-0.00, 0.01) |         | 129                        | 0.004  | (-0.01, 0.01) |         |
| Snus only up to 34w                                   | 11                                                | -0.01  | (-0.04, 0.02) |         | 11                         | -0.01  | (-0.04, 0.02) |         |
| Smoke/dual                                            | 90                                                | 0.01   | (0.00, 0.02)  |         | 90                         | 0.01   | (0.00, 0.02)  |         |
| <b>Thoracic circumference/Head circumference</b>      |                                                   |        |               |         |                            |        |               |         |
|                                                       | <b>Univariable</b>                                |        |               |         | <b>Multivariable (1-4)</b> |        |               |         |
|                                                       |                                                   |        |               | 0.72    |                            |        |               | 0.68    |
| Never                                                 | 1695                                              | Ref.   |               |         | 1695                       | Ref.   |               |         |
| Snus                                                  | 139                                               | -0.002 | (-0.01, 0.01) |         | 139                        | -0.003 | (-0.01, 0.01) |         |
| Smoke/dual                                            | 88                                                | 0.003  | (-0.01, 0.01) |         | 88                         | 0.003  | (-0.01, 0.01) |         |
|                                                       |                                                   |        |               | 0.55    |                            |        |               | 0.41    |
| Never                                                 | 1695                                              | Ref.   |               |         | 1695                       | Ref.   |               |         |
| Snus only up to 18w                                   | 129                                               | -0.001 | (-0.01, 0.01) |         | 129                        | -0.001 | (-0.01, 0.01) |         |
| Snus only up to 34w                                   | 10                                                | -0.02  | (-0.05, 0.01) |         | 10                         | -0.03  | (-0.06, 0.01) |         |
| Smoke/dual                                            | 88                                                | 0.003  | (-0.01, 0.01) |         | 88                         | 0.003  | (-0.01, 0.01) |         |

| Birth weight/Placenta weight |      |       |               |                     |      |       |               |
|------------------------------|------|-------|---------------|---------------------|------|-------|---------------|
| Univariable                  |      |       |               | Multivariable (1-4) |      |       |               |
|                              |      |       |               | 0.65                |      |       | 0.46          |
| Never                        | 1368 | Ref.  |               |                     | 1340 | Ref.  |               |
| Snus                         | 126  | -0.09 | (-0.34, 0.16) |                     | 126  | -0.12 | (-0.37, 0.12) |
| Smoke/dual                   | 64   | 0.10  | (-0.24, 0.43) |                     | 64   | 0.12  | (-0.21, 0.46) |
|                              |      |       |               | 0.83                |      |       | 0.67          |
| Never                        | 1368 | Ref.  |               |                     | 1368 | Ref.  |               |
| Snus only up to 18w          | 116  | -0.10 | (-0.35, 0.16) |                     | 116  | -0.12 | (-0.38, 0.13) |
| Snus only up to 34w          | 10   | -0.02 | (-0.86, 0.82) |                     | 10   | -0.13 | (-0.97, 0.70) |
| Smoke/dual                   | 64   | 0.10  | (-0.24, 0.43) |                     | 64   | 0.12  | (-0.22, 0.46) |

Covariates used in multivariable analyses: 1=Parity, 2=gestational age at birth, 3=fetal sex, 4=maternal age.

No.number, B=beta coefficient, CI=confidence interval, Ref.=reference value

**Figure S1 Study population.**

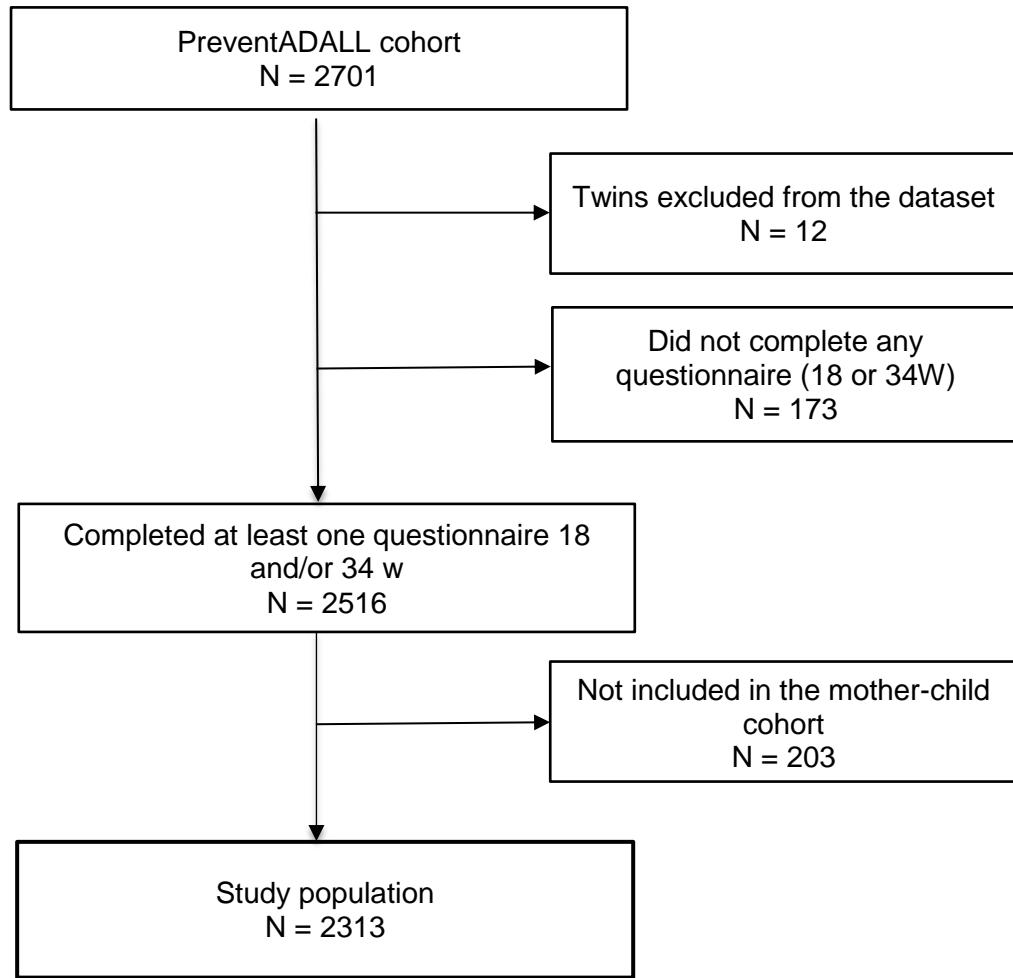

Supplement: 00255-2019.SUPPLEMENT.pdf [file 00255-2019.SUPPLEMENT.pdf]
